# Supplementary material for: Estimation of temporal covariances in pathogen dynamics using Bayesian multivariate autoregressive models
Source: PubMed Central journal article supplement (PMC6934324; doi:10.1371/journal.pcbi.1007492), 2019-12-13

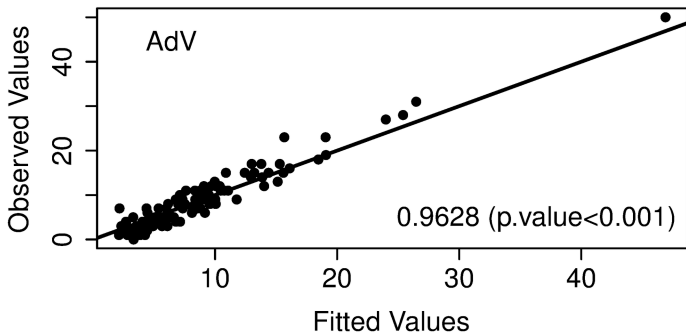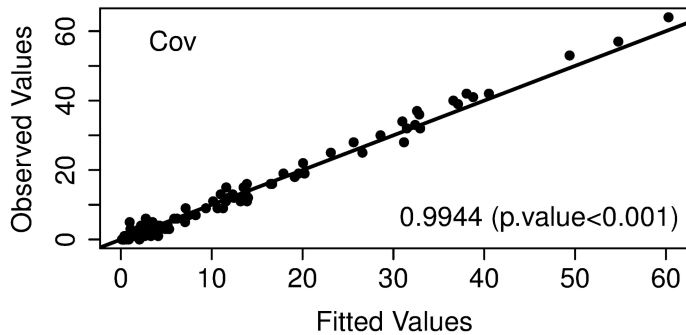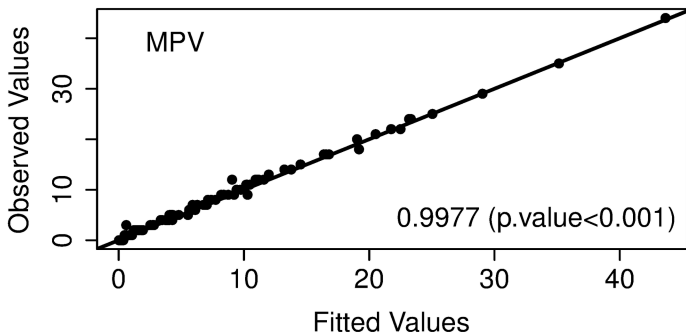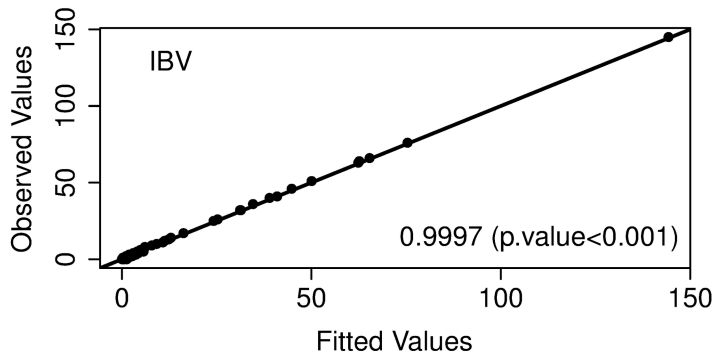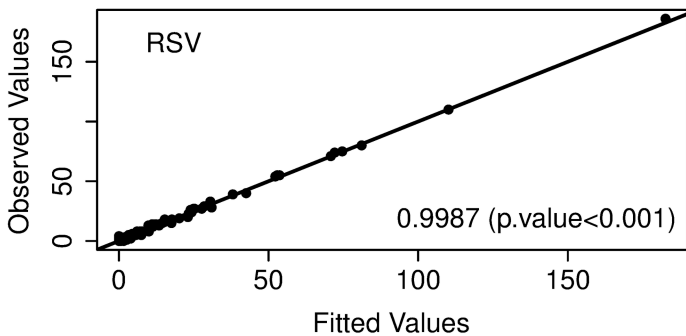

Supplement: pcbi.1007492.s002.pdf [file pcbi.1007492.s002.pdf]
